# Supplementary material
Source: HighWire-hosted journal article supplement (https://svn.smart01.highwire.org/content/6/1/95)
Supplement: inline-supplementary-material-1 [file inline-supplementary-material-1.pdf]

Table S1. Outcomes of Primary endpoints and Secondary endpoints from the treatment groups in PP population

| Outcomes                         | Treatment   |                     | Risk Difference<br>(95%CI) | Relative Risk<br>(95%CI) | P value |
|----------------------------------|-------------|---------------------|----------------------------|--------------------------|---------|
|                                  | SAP<br>n=26 | Regular CAS<br>n=30 |                            |                          |         |
| Primary endpoints                | 0 (0.0)     | 3 (10.0)            | -10.0 (-22.5 to 1.1)       | NA                       | 0.24    |
| Secondary endpoints              |             |                     |                            |                          |         |
| HPP                              | 0 (0.0)     | 7 (23.3)            | -23.3 (-37.9 to -9.5)      | NA                       | 0.01    |
| Procedure-related adverse events | 1 (3.8)     | 2 (6.7)             | -3.0 (-14.9 to 9.2)        | 0.79(0.34-1.83)          | 1.00    |
| Myocardial infarction            | 1 (3.8)     | 1 (3.3)             | -0.5 (-10.3 to 11.9)       | 1.07(0.26-4.39)          | 1.00    |
| Hemorrhage 30 days to 1 year     | 0 (0.0)     | 0 (0.0)             | NA                         | NA                       | 1.00    |
| Death at 30 days                 | 0 (0.0)     | 0 (0.0)             | NA                         | NA                       | 1.00    |
| Stroke resulting in deformity    | 0 (0.0)     | 0 (0.0)             | NA                         | NA                       | 1.00    |

Abbreviations: SAP, staged angioplasty; CAS, carotid artery stenting; PP, per-protocol; HPP, hyperperfusion phenomenon
